# Supplementary material for: Development and Multicenter Case–Control Validation of Urinary Comprehensive Genomic Profiling for Urothelial Carcinoma Diagnosis, Surveillance, and Risk-Prediction
Source: PubMed Central journal article supplement — Clin Cancer Res. 2023 Jul 13;29(18):3668–80. doi: 10.1158/1078-0432.CCR-23-0570 (PMC10502470; doi:10.1158/1078-0432.ccr-23-0570), 2023-07-13
Supplement: ccr-23-0570_supplementary_tables_1-8_suppst1-8.pdf [file ccr-23-0570_supplementary_tables_1-8_suppst1-8.pdf]

**Supplemental Table 1.** Inclusion and exclusion criteria for clinical cohorts analyzed in this investigation.

| Cohort                       | Inclusion Criteria                                                                                                                                                                                                                                         | Exclusion Criteria                                                                                                                                                                                                                                                                         |
|------------------------------|------------------------------------------------------------------------------------------------------------------------------------------------------------------------------------------------------------------------------------------------------------|--------------------------------------------------------------------------------------------------------------------------------------------------------------------------------------------------------------------------------------------------------------------------------------------|
| <i>Tumor Positive</i>        | <ul style="list-style-type: none"> <li>• Consented.</li> <li>• Pathologically confirmed UC present in urinary tract at time of collection.</li> <li>• Sample collected prior to surgical resection of lesion.</li> </ul>                                   | <ul style="list-style-type: none"> <li>• Prior history of pelvic radiation.</li> </ul>                                                                                                                                                                                                     |
| <i>Surveillance Negative</i> | <ul style="list-style-type: none"> <li>• Consented.</li> <li>• UC patient with prior definitive surgical treatment and negative cystoscopy within 1 month of collection, and a second negative cystoscopy 3-12 months following the collection.</li> </ul> | <ul style="list-style-type: none"> <li>• Prior history of pelvic radiation.</li> </ul>                                                                                                                                                                                                     |
| <i>Urology Control</i>       | <ul style="list-style-type: none"> <li>• Consented.</li> </ul>                                                                                                                                                                                             | <ul style="list-style-type: none"> <li>• Pathologic, cystoscopic, or imaging evidence of, or a known history of UC.</li> <li>• Pathologic, imaging, or laboratory evidence of current or prior prostate or renal cancer</li> <li>• Hematuria not evaluated to standard of care.</li> </ul> |

**Supplemental Table 2.** AUA Hematuria risk stratification of hematuria subjects with available data ( $n = 129$ ) among train and validation cohorts.

| <b>AUA Hematuria Risk Group</b> | <b>uCGP Cohorts</b> | <b>Reference from 15,000+ patient meta-analysis [3]</b> |
|---------------------------------|---------------------|---------------------------------------------------------|
| High                            | 85.3%               | 83.6%                                                   |
| Intermediate                    | 13.2%               | 11.8%                                                   |
| Low                             | 1.6%                | 4.6%                                                    |

**Supplemental Table 3.** Test sensitivity and specificity performance stratified by institution.  
 \*Sample size numbers listed in order of train, validation (aggregated performance across sites),  
 CURE (validation), MGH (validation), and OSU (validation) cohorts.

|                                                 | <b>Train</b>    | <b>Validation</b> | <b>CURE</b>     | <b>MGH</b>      | <b>OSU</b>      |
|-------------------------------------------------|-----------------|-------------------|-----------------|-----------------|-----------------|
| <b>% Sensitivity</b>                            |                 |                   |                 |                 |                 |
| <b>Initial Diagnosis</b>                        |                 |                   |                 |                 |                 |
| Overall (56/22/10/6/6)*                         | 98<br>(90-100)  | 96<br>(77-100)    | 90<br>(56-100)  | 100<br>(54-100) | 100<br>(54-100) |
| High Grade (42/14/6/3/5)                        | 100<br>(92-100) | 100<br>(77-100)   | 100<br>(54-100) | 100<br>(29-100) | 100<br>(48-100) |
| Low Grade (14/8/4/3/1)                          | 93<br>(66-100)  | 88<br>(47-100)    | 75<br>(19-99)   | 100<br>(29-100) | 100<br>(3-100)  |
| NMIBC (38/18/8/6/4)                             | 97<br>(86-100)  | 94<br>(73-100)    | 88<br>(47-100)  | 100<br>(54-100) | 100<br>(40-100) |
| MIBC (16/4/2/-/2)                               | 100<br>(79-100) | 100<br>(40-100)   | 100<br>(16-100) | -               | 100<br>(16-100) |
| <b>Surveillance</b>                             |                 |                   |                 |                 |                 |
| Overall (38/48/16/24/8)                         | 74<br>(57-87)   | 65<br>(50-78)     | 69<br>(41-89)   | 58<br>(37-78)   | 75<br>(35-97)   |
| High Grade (17/17/4/7/6)                        | 88<br>(64-99)   | 77<br>(50-93)     | 75<br>(19-99)   | 71<br>(29-96)   | 83<br>(36-100)  |
| Low Grade (18/31/12/17/2)                       | 56<br>(31-79)   | 58<br>(39-76)     | 67<br>(35-90)   | 53<br>(28-77)   | 50<br>(1-99)    |
| NMIBC (27/47/16/24/7)                           | 67<br>(46-84)   | 64<br>(49-77)     | 69<br>(41-89)   | 58<br>(37-78)   | 71<br>(29-96)   |
| MIBC (4/1/-/-/1)                                | 100<br>(40-100) | 100<br>(3-100)    | -               | -               | 100<br>(3-100)  |
| <b>Upper Tract UC</b>                           |                 |                   |                 |                 |                 |
| Overall (7/2/2/-/-)                             | 100<br>(40-100) | 100<br>(16-100)   | 100<br>(16-100) | -               | -               |
| <b>% Specificity</b>                            |                 |                   |                 |                 |                 |
| <b>Initial Diagnosis</b>                        |                 |                   |                 |                 |                 |
| All urology controls (139/96/48/47/1)*          | 96<br>(91-98)   | 90<br>(82-95)     | 90<br>(77-97)   | 89<br>(77-97)   | 100<br>(3-100)  |
| Controls with UTI (23/10/9/1/-)                 | 100<br>(85-100) | 90<br>(56-100)    | 89<br>(52-100)  | 100<br>(3-100)  | -               |
| Controls with hematuria (70/37/32/5/-)          | 96<br>(88-99)   | 87<br>(71-96)     | 88<br>(71-97)   | 80<br>(28-100)  | -               |
| Controls with BPH (22/26/19/7/-)                | 96<br>(77-100)  | 85<br>(65-96)     | 90<br>(67-99)   | 71<br>(29-96)   | -               |
| Controls with Leukocytes (48/14/14/-/-)         | 98<br>(89-100)  | 86<br>(57-98)     | 86<br>(57-98)   | -               | -               |
| Controls with LUTS (29/20/13/7/-)               | 93<br>(77-99)   | 80<br>(56-94)     | 85<br>(55-98)   | 71<br>(29-96)   | -               |
| <b>Surveillance</b>                             |                 |                   |                 |                 |                 |
| Hx UC with negative cystoscopy (100/82/35/44/3) | 89<br>(81-94)   | 89<br>(80-95)     | 91<br>(77-98)   | 86<br>(73-95)   | 100<br>(29-100) |
| <b>% Pos Predictive Value</b>                   |                 |                   |                 |                 |                 |
| Hematuria/Initial diagnosis (10% Prevalence)    | 72              | 51                | 49              | 51              | 100             |
| Recurrence monitoring (20% Prevalence)          | 63              | 59                | 67              | 52              | 100             |
| <b>% Neg Predictive Value</b>                   |                 |                   |                 |                 |                 |
| Hematuria/Initial diagnosis (10% Prevalence)    | 100             | 99                | 99              | 100             | 100             |
| Recurrence monitoring (20% Prevalence)          | 93              | 91                | 92              | 89              | 94              |

**Supplemental Table 4.** Comparison of pre- and post-test probability of UC given diagnostic likelihood ratios (DLR) for positive and negative tests. Values taken from Woldu *et. al.* 2021 [25]. CI denotes 95% confidence intervals.

| Pre-test prob. of UC    | Positive likelihood ratio | Post-test prob. of UC | Negative likelihood ratio | Post-test prob. of UC |
|-------------------------|---------------------------|-----------------------|---------------------------|-----------------------|
| <b>NMP22</b>            |                           |                       |                           |                       |
| 0.5%                    |                           | 1.5                   |                           | 0.2                   |
| 1.0%                    | 3.05                      | 3.0                   | 0.4                       | 0.4                   |
| 3.0%                    | CI: (2.28-4.10)           | 8.6                   | CI: (0.32-0.50)           | 1.2                   |
| 10.0%                   |                           | 25.3                  |                           | 4.3                   |
| <b>BTA</b>              |                           |                       |                           |                       |
| 0.5%                    |                           | 1.3                   |                           | 0.2                   |
| 1.0%                    | 2.52                      | 2.5                   | 0.47                      | 0.5                   |
| 3.0%                    | CI: (1.86-3.41)           | 7.2                   | CI: (0.37-0.61)           | 1.4                   |
| 10.0%                   |                           | 21.9                  |                           | 5.0                   |
| <b>UroVysion (FISH)</b> |                           |                       |                           |                       |
| 0.5%                    |                           | 2.5                   |                           | 0.2                   |
| 1.0%                    | 5.02                      | 4.8                   | 0.42                      | 0.4                   |
| 3.0%                    | CI: (2.93-8.60)           | 13.4                  | CI: (0.30-0.59)           | 1.3                   |
| 10.0%                   |                           | 35.8                  |                           | 4.5                   |
| <b>ImmunoCyt</b>        |                           |                       |                           |                       |
| 0.5%                    |                           | 1.7                   |                           | 0.1                   |
| 1.0%                    | 3.49                      | 3.4                   | 0.29                      | 0.3                   |
| 3.0%                    | CI: (2.82-4.32)           | 9.7                   | CI: (0.20-0.41)           | 0.9                   |
| 10.0%                   |                           | 27.9                  |                           | 3.1                   |
| <b>CxBladder</b>        |                           |                       |                           |                       |
| 0.5%                    |                           | 1.1                   |                           | 0.1                   |
| 1.0%                    | 2.14                      | 2.1                   | 0.21                      | 0.2                   |
| 3.0%                    |                           | 6.2                   |                           | 0.6                   |
| 10.0%                   |                           | 19.2                  |                           | 2.3                   |
| <b>AssureMDx</b>        |                           |                       |                           |                       |
| 0.5%                    |                           | 3.2                   |                           | 0.0                   |
| 1.0%                    | 6.6                       | 6.3                   | 0.07                      | 0.1                   |
| 3.0%                    |                           | 17.0                  |                           | 0.2                   |
| 10.0%                   |                           | 42.3                  |                           | 0.8                   |
| <b>GeneXpert</b>        |                           |                       |                           |                       |
| 0.5%                    |                           | 2.4                   |                           | 0.1                   |
| 1.0%                    | 4.98                      | 4.8                   | 0.27                      | 0.3                   |
| 3.0%                    |                           | 13.3                  |                           | 0.8                   |
| 10.0%                   |                           | 35.6                  |                           | 2.9                   |
| <b>Cytology</b>         |                           |                       |                           |                       |
| 0.5%                    |                           | 3.7                   |                           | 0.2                   |
| 1.0%                    | 7.67                      | 7.2                   | 0.35                      | 0.4                   |
| 3.0%                    | CI: (4.51-13.03)          | 19.2                  | CI: (0.18-0.68)           | 1.1                   |
| 10.0%                   |                           | 46.0                  |                           | 3.7                   |
| <b>UroAmp</b>           |                           |                       |                           |                       |
| 0.5%                    |                           | 4.4                   |                           | 0.03                  |
| 1.0%                    | 9.2                       | 8.5                   | 0.05                      | 0.05                  |
| 3.0%                    | CI: (5.1-16.6)            | 22.1                  | CI: (0.01-0.34)           | 0.16                  |
| 10.0%                   |                           | 50.5                  |                           | 0.56                  |

**Supplemental Table 5.** UroAmp test features predictive of tumor grade and stage. Results calculated from tumor-positive subjects in aggregated train and validation cohorts ( $n = 164$ ). Abbreviations: Odds ratio (OR), 95% confidence interval (CI), High grade (HG), Low grade (LG), Muscle-invasive bladder cancer (MIBC), Non-muscle-invasive bladder cancer (NMIBC), Carcinoma *in situ* (CIS), Loss of heterozygosity (LOH). (\*) Mutation only observed in one condition. (<sup>WT</sup>) Unmutated gene. (p-adj) denotes false discovery rate adjusted  $P$ -value.

| Comparison                      | Feature                               | OR           | CI           | $P$ -value | $P$ -adj | Positives |
|---------------------------------|---------------------------------------|--------------|--------------|------------|----------|-----------|
| <i>HG vs. LG</i>                | * <i>CDKN1A</i>                       | > 30         | –            | 0.0348     | 0.0547   | 6         |
|                                 | <i>TERT, TP53, FGFR3<sup>WT</sup></i> | 28           | (3.8, 220)   | < 0.0001   | < 0.0001 | 27        |
|                                 | Gene CNV                              | 14           | (4.7, 42)    | < 0.0001   | < 0.0001 | 45        |
|                                 | <i>RB1</i>                            | 13           | (1.7, 100)   | 0.0019     | 0.0052   | 15        |
|                                 | <i>TP53</i>                           | 9.9          | (3.9, 25)    | < 0.0001   | < 0.0001 | 49        |
|                                 | Copy-neutral LOH                      | 6.6          | (2.6, 17)    | < 0.0001   | 0.0001   | 40        |
|                                 | Whole-Genome Aneuploidy               | 4.9          | (2.2, 11)    | < 0.0001   | 0.0001   | 50        |
|                                 | <i>TERT, FGFR3<sup>WT</sup></i>       | 3.4          | (1.7, 6.9)   | 0.0005     | 0.0019   | 58        |
|                                 | INDELS                                | 2.8          | (1.4, 5.5)   | 0.0046     | 0.0100   | 56        |
|                                 | <i>TERT</i>                           | 2.0          | (1.1, 3.9)   | 0.0347     | 0.0547   | 99        |
|                                 | <i>FGFR3</i>                          | 0.33         | (0.17, 0.65) | 0.0011     | 0.0035   | 61        |
| <i>FGFR3, TERT<sup>WT</sup></i> | 0.22                                  | (0.08, 0.64) | 0.0037       | 0.0090     | 20       |           |
| <i>MIBC vs. NMIBC</i>           | <i>TP53</i>                           | 7.4          | (2.9, 19)    | < 0.0001   | 0.0004   | 46        |
|                                 | <i>TERT, TP53, FGFR3<sup>WT</sup></i> | 6.5          | (2.5, 17)    | 0.0002     | 0.0028   | 25        |
|                                 | Gene CNV                              | 4.9          | (2.0, 12)    | 0.0008     | 0.0063   | 41        |
|                                 | Whole-Genome Aneuploidy               | 4.4          | (1.8, 11)    | 0.0015     | 0.0093   | 48        |
|                                 | <i>TERT, FGFR3<sup>WT</sup></i>       | 3.6          | (1.5, 8.8)   | 0.0050     | 0.0242   | 53        |
|                                 | <i>TERT</i>                           | 3.0          | (1.1, 8.6)   | 0.0429     | 0.1358   | 94        |
|                                 | Copy-neutral LOH                      | 2.4          | (0.98, 6.0)  | 0.0731     | 0.1949   | 38        |
|                                 | <i>FGFR3</i>                          | 0.33         | (0.12, 0.93) | 0.0429     | 0.1358   | 61        |
|                                 | * <i>FGFR3, TERT<sup>WT</sup></i>     | 0.00         | –            | 0.0453     | 0.1358   | 20        |
| <i>HG T1+ vs. HG Ta/CIS</i>     | <i>TP53</i>                           | 6.0          | (2.3, 16)    | 0.0002     | 0.0025   | 40        |
|                                 | <i>TERT, TP53, FGFR3<sup>WT</sup></i> | 3.2          | (1.1, 9.2)   | 0.0307     | 0.1880   | 24        |
| <i>CIS vs. Ta</i>               | <i>TERT, TP53, FGFR3<sup>WT</sup></i> | 9.9          | (1.8, 53)    | 0.0176     | 0.2381   | 7         |
|                                 | <i>KMT2A</i>                          | 6.4          | (1.3, 31)    | 0.0380     | 0.2568   | 9         |
|                                 | <i>TERT, FGFR3<sup>WT</sup></i>       | 5.4          | (1.4, 21)    | 0.0164     | 0.2381   | 27        |
|                                 | <i>TP53</i>                           | 5.2          | (1.3, 21)    | 0.0334     | 0.2568   | 15        |
|                                 | <i>FGFR3</i>                          | 0.26         | (0.05, 1.3)  | 0.1027     | 0.3082   | 49        |

**Supplemental Table 6.** Clinical demographics of the long-term outcomes cohort used for uCGP predicted recurrence risk ( $n = 55$ ).

|                                   | <b>Recurrence Status</b> |     |
|-----------------------------------|--------------------------|-----|
|                                   | No                       | Yes |
| <b>Primary Grade</b>              |                          |     |
| HG                                | 23                       | 5   |
| LG                                | 22                       | 5   |
| CIS                               | 1                        | 0   |
| T1                                | 8                        | 1   |
| T2                                | 1                        | 0   |
| T3                                | 1                        | 0   |
| Ta                                | 33                       | 9   |
| unavailable                       | 1                        | 0   |
| <b>AUA Recurrent Risk</b>         |                          |     |
| high                              | 13                       | 4   |
| intermediate                      | 16                       | 2   |
| low                               | 13                       | 4   |
| unavailable                       | 3                        | 0   |
| <b>Prior Intravesical Therapy</b> |                          |     |
| no                                | 24                       | 6   |
| yes                               | 21                       | 4   |
| <b>Age</b>                        |                          |     |
| <70                               | 20                       | 3   |
| ≥70                               | 25                       | 7   |
| <b>Sex</b>                        |                          |     |
| F                                 | 9                        | 2   |
| M                                 | 36                       | 8   |
| <b>Smoking History</b>            |                          |     |
| current                           | 7                        | 0   |
| former                            | 22                       | 7   |
| never                             | 16                       | 3   |
| <b>Race</b>                       |                          |     |
| Asian                             | 5                        | 0   |
| Black or African American         | 0                        | 1   |
| Hispanic or Latino                | 1                        | 1   |
| White                             | 38                       | 8   |
| other                             | 1                        | 0   |

**Supplemental Table 7.** Univariable Cox proportional-hazard regression analysis of UroAmp recurrence risk groups and clinical risk factors. For stage, T1+ indicated the grouping of patients with T1, T2, and T3 disease.

| Feature                   | Univariable          |         |
|---------------------------|----------------------|---------|
|                           | HR (95% CI)          | P-value |
| UroAmp Recurrence Risk    | 6.2<br>[ 1.6 - 24]   | 0.008   |
| ≥70 vs. <70               | 2.1<br>[0.55 - 8.3]  | 0.272   |
| Smoking: Ever vs. Never   | 0.74<br>[0.19 - 2.9] | 0.658   |
| Male vs. Female           | 0.90<br>[0.19 - 4.3] | 0.897   |
| Primary Grade: HG vs. LG  | 1.0<br>[0.29 - 3.5]  | 0.995   |
| Primary Stage: T1+ vs. Ta | 0.28<br>[0.04 - 2.2] | 0.228   |

**Supplemental Table 8.** Comparison of urine cytology and UroAmp in  $n = 66$  urine specimens (18 initial diagnosis, 48 surveillance). Urine cytology returned atypical results in 21 of these 66 patients. Values in parenthesis denote 95% confidence intervals. Positive and negative predictive values were computed with an assumption of 15% prevalence.

|                                   | <b>UroAmp</b>     | <b>Urine Cytology<br/>(atypical<br/>withheld)</b> | <b>Urine Cytology<br/>(atypical as<br/>negative)</b> | <b>Urine Cytology<br/>(atypical as<br/>positive)</b> | <b>UroAmp<br/>(atypical<br/>cytology)</b> |
|-----------------------------------|-------------------|---------------------------------------------------|------------------------------------------------------|------------------------------------------------------|-------------------------------------------|
| <b>% Sensitivity<br/>(95% CI)</b> |                   |                                                   |                                                      |                                                      |                                           |
| Overall<br>( $n = 19$ )           | 79<br>(54 - 94)   | 25<br>(6 - 57)                                    | 16<br>(3 - 40)                                       | 53<br>(29 - 76)                                      | 86<br>(42 - 100)                          |
| High Grade<br>( $n = 7$ )         | 100<br>(59 - 100) | 50<br>(7 - 93)                                    | 29<br>(4 - 71)                                       | 71<br>(29 - 96)                                      | 100<br>(29 - 100)                         |
| Low Grade<br>( $n = 12$ )         | 67<br>(35 - 90)   | 13<br>(0.3 - 53)                                  | 8<br>(0.2 - 39)                                      | 42<br>(15 - 72)                                      | 75<br>(19 - 99)                           |
| <b>% Specificity<br/>(95% CI)</b> |                   |                                                   |                                                      |                                                      |                                           |
| Overall<br>( $n = 47$ )           | 83<br>(69 - 92)   | 94<br>(80 - 99)                                   | 96<br>(86 - 100)                                     | 66<br>(51 - 79)                                      | 71<br>(42 - 92)                           |
| <b>% PPV</b>                      | 45                | 42                                                | 39                                                   | 21                                                   | 35                                        |
| <b>% NPV</b>                      | 96                | 88                                                | 87                                                   | 89                                                   | 97                                        |
